1  
2  
3  
4  
5  
6  
7  
8  
9  
10  
11  
12  
13  
14  
15  
16  
17  
18  
19  
20  
21  
22  
23  
24  
25  
26  
27  
28

**Serotonergic and catecholaminergic (dopaminergic) oscillations in the  
reproductive regulation of Japanese quail**

Suneeta Yadav and Chandra Mohini Chaturvedi  
Department of Zoology, Banaras Hindu University, Varanasi 221 005, India  
(Email- cmcbhu@gmail.com, suneeta17bhu@gmail.com)

Running Title: **Phase relation of serotonin and dopamine regulates reproduction of  
Japanese quail**

\*Corresponding Author:-  
Prof. (Mrs.) Chandra Mohini Chaturvedi,  
Department of Zoology, Banaras Hindu University  
Varanasi-221 005, U.P., INDIA,  
Phone No. 0542-6702506, 9415819743  
Fax: 0542-6702506  
E-mail: suneeta17bhu@gmail.com, cmcbhu@gmail.com

## 29 Abstract

30 Specific temporal phase relation of serotonergic and dopaminergic oscillations alters  
 31 reproductive responses in many species. Aim of the study was to confirm whether effect  
 32 of serotonergic drug (5-HTP) and dopaminergic drug (L-DOPA) is due to their  
 33 conversion into serotonin and dopamine respectively or other products. For this study,  
 34 PCPA (p-chlorophenylalanine, a long lasting inhibitor of serotonin synthesis), DDC  
 35 (Diethyldithiocarbamate, which inhibits biosynthesis of nor-adrenaline),  $\alpha$ -MT (Methyl-  
 36 p-tyrosine, an inhibitor for the conversion of tyrosine to DOPA) and DOPS  
 37 (Dihydroxyphenylserine, a specific precursor for noradrenaline) were used in different  
 38 groups in addition to 5-HTP and L-DOPA given at specific time interval. Reproductive  
 39 responses monitored at 10 weeks post treatment indicate that gonadal activity was  
 40 significantly low in HTP:DOPA (8-hr quail), HTP+PCPA:DOPA and  
 41 HTP:DOPA+DDC quail compare to control (S:S). However, gonadal activity of  
 42 HTP:S(HTP control), S:DOPA(DOPA control) and HTP: $\alpha$ -MT+DOPS was not  
 43 different from S:S control and remained in active condition. These findings indicate  
 44 that it is not the dose of neurotransmitter precursor drugs (5-HTP and L-DOPA) and the  
 45 neurotransmitters (serotonin and dopamine itself) that cause the effect, instead it is the  
 46 function of interval between the drug administration which induces or entrains specific  
 47 phase relation between serotonergic and dopaminergic oscillations. Further, gonadal  
 48 suppression observed in HTP:DOPA, HTP+PCPA:DOPA and HTP:DOPA+DDC group  
 49 three groups is not due to injection of 5-HTP or L-DOPA (alone) but due to conversion  
 50 of administered 5-HTP into serotonin and conversion of L-DOPA (administered) into  
 51 dopamine; not due to their further conversion into catecholamines other than dopamine  
 52 i.e. noradrenaline or adrenaline.

53  
 54 **Keywords:** 5-HTP; L-DOPA; Specific temporal phase relation; Serotonergic and  
 55 dopaminergic oscillations  
 56

57

58

59

60

61

62

63

64

65

## 66 **Introduction**

67       The studies on neurotransmitters proves that the brain levels of nor-epinephrine  
68 (Owasoyo and Walker, 1980), dopamine (Owasoyo *et al.*, 1979), acetylcholine (Saito,  
69 1971) as well as pineal melatonin (Lynch, 1971) were highest during the dark phase of  
70 the light:dark cycle and lowest during the light phase where as serotonin (Quay, 1968;  
71 Owasoyo and Walker, 1980) shows an opposite circadian pattern with peak levels  
72 occurring during light phase of the light:dark cycle. It has also been shown that brain  
73 serotonin and other neurotransmitters (dopamine) exhibit circadian variation in different  
74 brain areas including suprachiasmatic nuclei (SCN) (Philo *et al.*, 1977; Héry *et al.*,  
75 1981; Wilson and Meier, 1987; 1988). Experimentally it has been demonstrated that the  
76 circadian rhythms exist in hormones as well as neurotransmitters viz. 5-HT, NE and DA  
77 (Manshardt and Wurtman, 1968; Wilson and Meier, 1987; Forsling, 2000; Tiwari *et al.*,  
78 2006). A number of studies also indicate the circadian release of 5-HT in blood and  
79 pineal of mammals, birds and fish (Reis and Wurtman, 1968; Reis *et al.*, 1969). Thus,  
80 there appears to be considerable synchrony throughout the brain with regards to the  
81 rhythms of neurotransmitters content and activity (Reis *et al.*, 1969; Le Bras, 1984;  
82 Khan and Joy, 1990).

83       It has been well established from several reports that administration of 5-HTP and L-  
84 DOPA at the interval of 12 hrs stimulates gonadal growth and body weight gain  
85 whereas administration of these drugs at the interval of 8 hrs results into opposite effect  
86 i.e. gonadal suppression in several avian (Red headed bunting- Chaturvedi and Bhatt,  
87 1990; Bhatt and Chaturvedi, 1992b; Phillips and Chaturvedi, 1992; Lal munia-  
88 Chaturvedi *et al.*, 1994; Japanese quail- Chaturvedi *et al.*, 1991; Bhatt and Chaturvedi,  
89 1992a; Phillips and Chaturvedi, 1995; Bhatt and Chaturvedi, 1998; Tiwari and

90 Chaturvedi, 2003; Chaturvedi et al., 2006; Kumar and Chaturvedi, 2008; Indian weaver  
91 bird- Chaturvedi et al., 1997; Spotted munia- Chaturvedi and Prasad, 1991; Prasad and  
92 Chaturvedi, 1992a, 1992b, 1992c, 2003) and mammalian species whether seasonally  
93 breeding (Syrian hamster- Wilson and Meier, 1989; Indian palm squirrel- Chaturvedi  
94 and Jaiwal, 1990; Jaiwal and Chaturvedi, 1991; Chaturvedi and Singh, 1992) or  
95 continuous breeder (laboratory mouse, *Mus musculus*- Sethi and Chaturvedi, 2009;  
96 Sethi et al, 2010).

97 In some of these studies, instead of 5-HTP and L-DOPA given at specific time  
98 interval, each drug was given in combination with saline (5-HTP & saline or saline &  
99 L-DOPA) (Prasad and Chaturvedi, 2003). Since these combinations did not produce  
100 any significant effect or long lasting effect, it was suggested that it is not the effect of  
101 either serotonin or dopamine alone, but actually the interval between the  
102 administrations of two drugs is important to mimic the seasonal gonadal condition. It  
103 was presumed and later on also proved experimentally that, these timed injection of  
104 serotonin and dopamine precursor drugs given for a period of 11-13 days may entrain  
105 circadian serotonergic and dopaminergic oscillation respectively. Moreover, the two  
106 precursor drugs given at different time interval will induce different phase relationship  
107 or phase angle between the two oscillations and different physiology (Yadav and  
108 Chaturvedi, 2014, 2015). Obviously, in nature also during sexually active and inactive  
109 condition these phase relations vary the underlying basis of our hypothesis and all the  
110 experimental studies in this direction (Wilson and Meier, 1987, 1988, 1989; Tiwari and  
111 Chaturvedi, 2003; Tiwari et al., 2006). In view of fact that neurotransmitters serotonin  
112 and dopamine do not cross the blood brain barrier but their precursor do cross  
113 (Bianchine, 1980) in all these studies 5-HTP and L-DOPA were used as the precursor  
114 of serotonin and dopamine respectively instead of neurotransmitter itself.

115 In case of Spotted munia, *Lonchura punctulata*, it has been proved that these  
116 effects are due to temporal phase relationship of circadian neural oscillations and not  
117 due to serotonin and dopamine alone (Prasad and Chaturvedi, 2003). L-DOPA not only  
118 gets converted into dopamine in the presence of enzyme tyrosine hydroxylase but the  
119 next biosynthetic product is the noradrenaline (by enzyme dopamine hydroxylase) and  
120 adrenaline (by enzyme N-methyl transferase) respectively. Further, tryptophan  
121 converts into 5-HTP (by tryptophan hydroxylase) and 5-HTP gets converted into  
122 serotonin (by enzyme aromatic amino acid decarboxylase) and next product is  
123 melatonin in certain tissues. This experiment was conducted to confirm that effects  
124 observed in the earlier studied are due to conversion of 5-HTP into serotonin and that of  
125 L-DOPA into dopamine only and not their next biosynthetic products. Hence agonist  
126 and antagonists of different enzymes were used an addition to 5-HTP and L-DOPA  
127 given at specific time interval to study the reproductive response of Japanese quail. The  
128 biosynthetic pathway of neurotransmitter serotonin and dopamine, conversion of  
129 dopamine into other catecholamines and agonists and antagonists of these biosynthetic  
130 products are described below in details along with the line diagram.

131 1. PCPA (p-chlorophenylalanine), a long lasting inhibitor of serotonin synthesis (Koe  
132 and Weiseman, 1966). It blocks the conversion of tryptophan into 5-HTP by  
133 inactivating the enzyme tryptophan hydroxylase. It does not affects the conversion of 5-  
134 HTP into serotonin.

135 2. DDC (Diethyldithiocarbamate), which inhibits the conversion of Dopamine to nor-  
136 adrenaline by inducing negative effect on the enzyme Dopamine  $\beta$ -hydroxylase,  
137 essential for this biosynthesis (Crevelling et al., 1968).

138 3.  $\alpha$ -MT (Methyl-p-tyrosine). An inhibitor for the conversion of tyrosine to DOPA by  
139 affecting the enzyme tyrosine hydroxylase.

140 4. DOPS (Dihydroxyphenylserine), a specific precursor for noradrenaline. So it  
141 enhances the synthesis of noradrenaline.

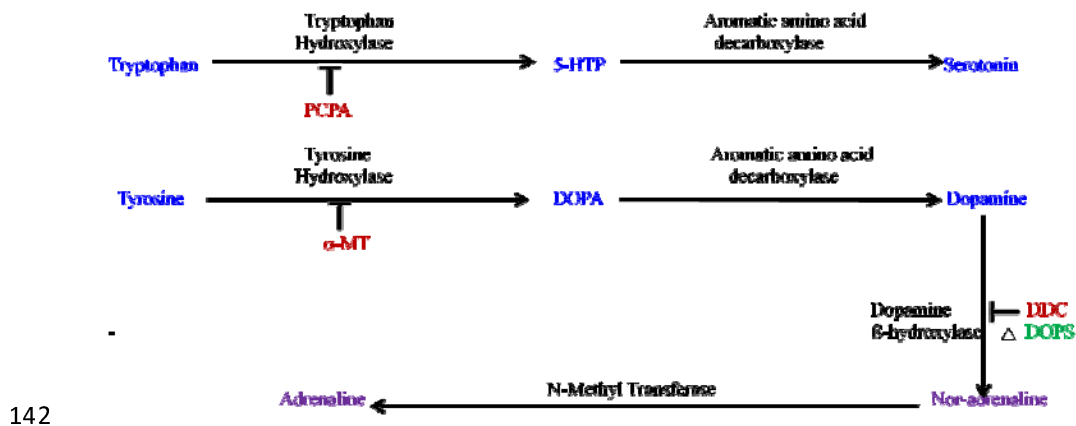

142  
143 The specific aim of the present study was to prove that stimulation (due to 12 hr  
144 phase relation) or regression (due to 8 hr phase relation) of gonadal development is due  
145 to specific temporal phase relation of serotonergic and dopaminergic activities or  
146 oscillations and not due to i) serotonin/5-HTP or dopamine/L-DOPA alone and ii) that  
147 L-DOPA was effective when converted into dopamine and not into noradrenaline or  
148 adrenaline. For the above mentioned objectives, some agonist/antagonists of serotonin  
149 (PCPA) and Dopamine ( $\alpha$ -MT, DDC, DOPS) were used in combination with these  
150 neurotransmitters (serotonin and dopamine) precursors (5-HTP and L-DOPA).

## 151 Materials and methods

152 Three week old male Japanese quail purchased from Chuck Gazaria farm,  
153 Lucknow, were divided into 7 groups each having 8 birds.

154

- 155 I (Saline control/S:S)- Receiving normal saline (0.9%) twice a day at 8  
156 am and 4pm i.e. at the interval of 8 hrs.
- 157 II (HTP control/5-HTP:S)- 5-HTP was administered at 8 am and saline at 4  
158 pm i.e.at the interval of 8 hrs.
- 159 III (DOPA control/S:L-DOPA)- Saline was injected at 8 am and L-DOPA at 4 pm  
160 i.e.at the interval of 8 hrs.
- 161 IV (HTP:DOPA)- 5-HTP and L-DOPA injections were given 8 hr  
162 apart.
- 163 V (HTP+PCPA:DOPA) - 5- HTP and PCPA were injected simultaneously at  
164 8 am, and L-DOPA was injected after 8 hrs.
- 165 VI (HTP:DOPA+DDC)- 5-HTP was injected at 8 am and 8 hrs later, L-  
166 DOPA and DDC were injected simultaneously.
- 167 VII (HTP: $\alpha$ -MT+DOPS)- 5-HTP was injected at 8 am and 8 hrs later,  $\alpha$ -MT  
168 and DOPS were injected simultaneously at 4 pm.

169 All the above injections were given intraperitoneally in 100  $\mu$ l saline at 8 am  
170 and 4 pm so as to establish 8-hr interval/phase relationship between the two injections  
171 or set of injections. The dose of 5-HTP and L-DOPA was 5mg/100g body weight per  
172 day for 13 days. The doses of antagonists were as follows- PCPA (2mg/100 g body wt.)  
173 DDC (10 mg/100g body wt.),  $\alpha$ -MT (1 mg/100g body wt.) and agonist of noradrenaline  
174 DOPS was (10mg/100 g body wt.). During the treatment of 13 days, all the birds were  
175 kept in dim continuous light (2 lux) and after the treatment period, birds of all the  
176 groups were transferred to long day condition (LD 16:8).

177 The length and width of the cloacal gland was measured *in situ* with dial  
178 calipers weekly; before, during and after the treatment upto the termination of study and  
179 cloacal gland volume was calculated in cm<sup>3</sup> (Jaiwal and Chaturvedi, 1991; Chaturvedi

180 *et al.*, 1993). At the terminations of study i.e. 10 weeks post treatment (at the age of 15  
181 weeks), blood was collected from the alar vein/wing vein into a heparinized tube and  
182 centrifuged at 4000 rpm for 20 min at 4°C to separate plasma and stored at -20° for  
183 hormonal assays to be performed later. Plasma testosterone level was measured using  
184 EIA kit (DSI s.r.l., Italy) following manufacturer's protocol. The antiserum used in the  
185 assay was 100% specific for testosterone (cross reactivity/specificity with testosterone  
186 was 100%); the cross reactivity of the assay was 0.056% with progesterone, 0.004%  
187 with cortisol, 0.005% with estradiol, 4.8% with dihydrotestosterone, 3.6% with  
188 androstenedione, 0.048% with androsterone, 0.004% with cortisone, 0.002% with  
189 estriol and 0.007% with estrone. The analytical sensitivity of the assay was 0.0576  
190 ng/ml. The intra-assay coefficient of variation (CV) is 5.6% whereas inter-assay CV is  
191 7.1%. Accuracy for this assay was 99%. Thereafter, birds from each group were  
192 weighed, deeply anaesthetized with thiopentone and then dissected to collect tissues so  
193 as to process for measuring testicular volume (cm<sup>3</sup>) and for calculating gonadosomatic  
194 index-GSI (in gram testes/100 gram body weight). Left testis of each quail after  
195 measuring its length and width *in situ* for calculating testicular volume was fixed in  
196 Zamboni's solution and processed for routine histological study and measurement of  
197 seminiferous tubule diameter. For histology, twenty-four hours after fixation, the testes  
198 were dehydrated in an ascending series of alcohol, treated with xylene and then  
199 embedded in paraffin wax. The 6-µm thick sections were cut by a Weswox rotary  
200 microtome (Western Electric and Scientific Works, Ambala Cantt, India), and stained  
201 with hematoxylin-eosin. Histological sections were viewed under a microscope  
202 (Axioskop 2 Plus; Carl Zeiss AG, Oberkochen, Germany) and images were captured  
203 with a digital camera. The diameter of the seminiferous tubules was determined in 10  
204 sections from each testis by using the oculometer and micrometer.



205 All the numerical data (cloacal gland and testicular volume, GSI, seminiferous  
206 tubule diameter and plasma testosterone concentration) were analyzed by one-way  
207 analysis of variance (ANOVA), followed by post hoc Dunnett test for the comparison  
208 of group means. Significance was calculated at the level of  $p < 0.05$ .

## 209 **Results**

210 Cloacal gland volume of quail of all the groups maintained under LD 16:8  
211 remained suppressed during the period of treatment (until 5 weeks of age). Thereafter a  
212 sharp increase until 9 weeks of age followed by maintenance of plateau at increased  
213 level was observed in saline: saline (S:S) i.e. saline control, HTP: saline i.e. HTP  
214 control, saline: DOPA i.e. DOPA control and HTP:  $\alpha$ -MT+DOPS group quail.  
215 However, those of HTP:DOPA, HTP+PCPA:DOPA and HTP:DOPA+DDC remained  
216 at significantly low level throughout the period of study compare to control  
217 (saline:saline) (Fig. 1). At the termination of study, testicular volume, GSI and plasma  
218 testosterone level of HTP:DOPA, HTP+PCPA:DOPA and HTP:DOPA+DDC group  
219 quail were significantly lower in comparison to saline control (S:S) but these  
220 parameters of other 3 groups were not different from saline control (Fig. 2, 3 and 4).

221 Histologically, the transverse section of testis of HTP:DOPA, HTP+PCPA:L-  
222 DOPA and HTP:DOPA+DDC 8-hr quail group had smaller seminiferous tubules (Fig.  
223 5) with decreased spermatogenesis along with vacuolation in HTP:DOPA and  
224 HTP:DOPA+DDC quail and atrophic changes with complete degeneration of  
225 spermatogenic activity was noted in HTP+PCPA:DOPA quail testis unlike full  
226 breeding condition in control (S:S). The interstitial spaces of the seminiferous tubules  
227 of these quail testes were reduced and no Leydig cells were evident in triangular spaces.  
228 Further, similar to the enlarged seminiferous tubules of saline control quail testis having  
229 all the stages of spermatogenesis and bunches of spermatozoa in the lumen, the testis of

230 HTP:S, S:DOPA and HTP: $\alpha$ -MT+DOPS also exhibited full breeding condition (Fig. 5  
231 and 6).

232

## 233 Discussion

234

235 Intraperitoneal injections of 5-HTP and L-DOPA (HTP:DOPA) given 8 hrs  
236 apart i.e. 8-hr phase relation of serotonergic and dopaminergic oscillations induced by  
237 their precursor injections suppressed gonadal activity significantly compared to saline  
238 treated control (S:S). On the other hand, reproductive parameters of quail receiving  
239 saline 8 hrs after 5-HTP (HTP:S) or 8 hrs before DOPA (S:DOPA) serving as HTP  
240 control and DOPA control respectively, did not differ from saline control (S:S). This  
241 indicates that suppressive effect of 5-HTP and L-DOPA when given 8 hrs apart (8-hr  
242 relation) was neither due to 5-HTP nor L-DOPA alone but is actually the outcome of  
243 the interval between the administration of serotonergic and dopaminergic precursor  
244 drugs inducing 8-hr temporal relationship between the two neural oscillations. In  
245 another group of birds, 5-HTP and PCPA was injected simultaneously followed by L-  
246 DOPA injection at interval 8 hr. PCPA blocks the conversion of tryptophan into 5-HTP  
247 by inactivating the enzyme tryptophan hydroxylase but it does not affect the conversion  
248 of 5-HTP into serotonin. Hence exogenous administration of PCPA blocked the  
249 conversion of endogenous tryptophan into 5-HTP, but exogenous 5-HTP was still  
250 converted into serotonin. Hence in fact, theoretically 8-hr phase relation of HTP:  
251 DOPA should not be different from HTP+PCPA:DOPA and accordingly gonadal  
252 response of these two groups are also similar i.e. gonado-suppressive.

253 In case of HTP:DOPA+DDC quail also, gonadal suppression was observed  
254 similar to those quail receiving only two drugs HTP:DOPA 8 hrs apart. The injection of  
255 DOPA (dopamine precursor) increases the synthesis of dopamine (DA) and enzyme

256 dopamine  $\beta$ -hydroxylase (DBH) converts DA into noradrenaline (NA). The drug DDC  
257 selectively inhibits NA synthesis because it inhibits the enzyme DBH therefore  
258 inhibiting the synthesis of NA. Hence simultaneous injection of DOPA and DDC is  
259 expected to stimulate dopamine synthesis but inhibits synthesis of NA. Obviously effect  
260 of this combination of drugs (HTP:DOPA+DDC) was also similar to that of HTP:  
261 DOPA combination indicating that inhibitory effect of 8-hr temporal relation of  
262 precursor drugs was only due to their conversion into serotonin and dopamine and not  
263 any further conversion into noradrenaline.

264 In the HTP: $\alpha$ -MT+DOPS group, quail received  $\alpha$ -MT and DOPS simultaneously  
265 8 hrs after 5-HTP administration and the effect was not different from control. The drug  
266  $\alpha$ -MT inhibits the conversion of the amino acid tyrosine to DOPA, whereas the drug  
267 DOPS is a specific precursor for NA. Hence, simultaneous injections these two drugs  
268 ( $\alpha$ -MT i.e. antagonist of DOPA synthesis and DOPS i.e. agonist of NA) should  
269 selectively inhibit synthesis of DOPA (and hence also the dopamine synthesis) and  
270 increase NA synthesis respectively. Because in this treatment of HTP: $\alpha$ -MT+DOPS,  
271 there is no exogenous DOPA (precursor of dopamine) and internal source of DOPA is  
272 also blocked by  $\alpha$ -MT, the DA synthesis is expected to be blocked completely but NA  
273 is still available synthesized from its selective precursor DOPS. Although natural  
274 precursor of adrenaline/NA i.e. dopamine is not available (as endogenous dopamine  
275 synthesis have been blocked by  $\alpha$ -MT, and exogenous DOPA is not available), but NA  
276 will be still available because of injecting its selective precursor DOPS. Thus this  
277 combination of drugs is equivalent to 8-hr relationship between 5-HTP/serotonin and  
278 NA (noradrenaline) and not the 5-HTP/ serotonin and L-DOPA /dopamine. But, in  
279 terms of gonadal response, effect is similar to HTP control which in turn is similar to  
280 saline control.

281           These various combinations of serotonergic and noradrenergic drugs instead of  
282   classical serotonin: dopamine combination indicates that reproductive effect of specific  
283   phase relation of neural oscillations occurs due to serotonin and dopamine; and not due  
284   to serotonin and noradrenaline (Fig. 1 and 6). These experimental findings following  
285   the use of various agonists and antagonist of monoamine (serotonin) and catecholamine  
286   (dopamine and noradrenaline) suggest that reproductive effect of 5-HTP and L- DOPA  
287   given 8 hrs apart apparently result from their conversion into serotonin and dopamine  
288   and not due to other monoamine/catecholamine. Selective potentiation of dopaminergic  
289   activity by DOPA and DDC injections did suppress reproductive development whereas  
290   specific inhibition of dopaminergic activity by  $\alpha$ -MT and stimulation of noradrenaline  
291   by DOPS injection did not. Therefore, HTP/ /serotonergic or L-DOPA/dopaminergic  
292   activity independently is unable to induce any change in gonadal activity which is  
293   actually the effect/function of interval between the administration of neurotransmitter  
294   precursor drugs 5-HTP and L- DOPA. Moreover, it is not the dose of neurotransmitter  
295   precursor drugs (5-HTP and L-DOPA) that cause the effect, instead it is the specific  
296   time interval between the drug administrations, otherwise the effects could have been  
297   similar in all cases and not the one observed in all the reports consistently. Invariably in  
298   many species, 8-hr phase relation is gonado-suppressive, 12-hr is gonado-stimulatory  
299   and other relations are ineffective (Chaturvedi and Bhatt, 1990; Chaturvedi and Yadav,  
300   2013).

301           Based on these findings it is restated that effects observed in the experiments of  
302   present study, are due to specific phase relation of serotonergic and dopaminergic  
303   oscillations induced by systemic injections of 5-HTP and L- DOPA given at different  
304   interval. Present findings also suggest that the observed effect are due to conversion of  
305   DOPA into dopamine and not into the next biosynthetic product (NA).

## 306    **Acknowledgements**

307    Junior research fellowship to Suneeta Yadav from University Grants Commission  
308    (BSR-RFSMS), New Delhi and Research projects to CMC from Department of science  
309    and Technology, New Delhi, India (SR/50/AS-14/2012) is gratefully acknowledged.

## 310    **References**

- 311    1. Bhatt, R. and Chaturvedi, C.M. (1992a). Specific phase relation (8-hr) of Neuro-  
312    transmitter precursor drugs alters body weight, plasma thyroxine, testes and cloacal  
313    gland responses of Japanese quail. PAVO. 30 (1&2), 9-16.
- 314    2. Bhatt, R. and Chaturvedi, C.M. (1992b). The effects of combined serotonin and  
315    dopamine precursor application during testicular photosensitivity vs  
316    photofractoriness of the Red headed bunting, *Emberiza bruniceps*. J. Interdiscipl.  
317    Cycle Res. 23 (2), 120-127.
- 318    3. Bhatt, R. and Chaturvedi, C.M. (1998). Phase relation of neurotransmitter affecting  
319    drugs (5-HTP and L-DOPA) alters photo-sexual responses (scotosensitive and  
320    scotorefractory) in Japanese quail. J. Environ. Biol. 19, 285-293.
- 321    4. Bianchine, J.R. (1980). Drugs for Parkinson's diseases. In: Goodman, L.S., Gilman,  
322    A.G, (eds.), The Pharmacological Basis of Therapeutics, 6<sup>th</sup> edn. Macmillan, New  
323    York, pp. 475-493.
- 324    5. Chaturvedi, C.M. and Bhatt, R. (1990). The effects of different temporal  
325    relationships of 5-hydroxytryptophan (5-HTP) and L-dihydroxyphenylalanine (L-  
326    DOPA) on reproductive and metabolic responses of migratory Red Headed Bunting  
327    (*Emberiza bruniceps*). J. Interdiscipl. Cycle Res. 21, 129-139.
- 328    6. Chaturvedi, C.M. and Jaiwal, R. (1990). Temporal synergism of neurotransmitter  
329    affecting drugs & seasonal reproductive responses of Indian Palm squirrel,  
330    *Funambulus pennanti*. J. Neural Transm. 81, 31-40.

- 331 7. Chaturvedi, C.M. and Prasad, S.K. (1991). Timed daily injections of  
332 Neurotransmitter precursor alter the gonad and body weights of Spotted munia,  
333 *Lonchura punctulata*, maintained under short daily photoperiods. J. Exp. Zool. 260,  
334 194-201.
- 335 8. Chaturvedi, C.M. and Singh, A.B. (1992). Suppression of annual testicular  
336 development in Indian Palm squirrel, *Funambulus pennanti* by 8-hr temporal  
337 relationship of serotonin and dopamine precursor drugs. J. Neural Transm. 88, 53-  
338 60.
- 339 9. Chaturvedi, C.M. and Yadav, S. (2013). Influence of temporal relationships  
340 between serotonergic and dopaminergic precursors on the regulation of gonadal  
341 development in birds. Gen. Comp. Endocrinol. 190, 203–213.
- 342 10. Chaturvedi, C.M., Meier, A.H. and Bhatt, R. (1991). Effect of 12-hr temporal  
343 relation of serotonin and dopamine precursor drugs (5-HTP and L-DOPA) on  
344 photo-sexual responses of immature Japanese quail. Ind. J. Exp. Bio. 29, 342-345.
- 345 11. Chaturvedi, C.M., Bhatt, R. and Phillips, D. (1993). Photoperiodism in Japanese  
346 *quail with special reference to relative refractoriness*. Ind. J. Exp. Biol. 31, 417-  
347 421.
- 348 12. Chaturvedi, C.M., Bhatt, R. and Prasad, S.K. (1994). Effect of timed administration  
349 of neurotransmitter drugs on testicular activity, body weight and plumage  
350 pigmentation in the Lal munia, *Estrilda amandava*. Ind. J. Exp. Biol. 32, 238-242.
- 351 13. Chaturvedi, C.M., Das, U.S. and Thapliyal, J.P. (1997). Comparative aspects in the  
352 reproductive endocrinology of the two sexes of weaver bird, *Ploceus philippinus*.  
353 In: Kawashima, S., Kikuyama, S. (Eds.), Advances in Comparative Endocrinology,  
354 Proceedings XIII Intern. Cong. Comp. Endocrinol., Japan, pp 451-455.

- 355 14. Chaturvedi, C.M., Tiwari, A.C. and Kumar, P. (2006). Effect of temporal synergism  
356 of neural oscillations on photorefractoriness in Japanese quail (*Coturnix coturnix*  
357 *japonica*). J. Exp. Zool. 305A, 3-12.
- 358 15. Crevelling, C.R., Daily, J., Tikuyama, T. and Wittkip, B. (1968). The combined use  
359 of  $\alpha$ -methy-tyrosine and threodihydroxyphenylserine: Selective reduction of  
360 dopamine levels in the central nervous system. Biochem. Pharmacol. 17, 65-70.
- 361 16. Forsling, M.L. (2000). Diurnal rhythms in neurohypophysial function. Exp Physiol.  
362 85, 179S-186S,
- 363 17. Héry, M., Dusticier, G., Faudon, M., Barrit, M.C. and Hey, F. (1981). Kinetic study  
364 of serotonin metabolism in the suprachiasmatic nucleus of the rat: neuroendocrine  
365 incidence (author's transl). J Physiol (Paris). 77 (2-3), 497-500.
- 366 18. Jaiwal, R. and Chaturvedi, C.M. (1991). Elimination of testicular regression by 12-  
367 hr temporal relationship of serotonergic and dopaminergic activity in Indian Palm  
368 squirrel, *Funambulus pennanti*. J. Neural Transm. 84, 45-52.
- 369 19. Khan, I.A. and Joy, K.P. (1990). Effects of season, pinealectomy, and blinding  
370 alone and in combination, on hypothalamic monoaminergic activity in the teleost  
371 *Channa punctatus* (Bloch). J Pineal Res. 8 (3), 277-287.
- 372 20. Koe, B.K. and Weissman, A. (1966). p-chlorophenylalanine: a specific depletory of  
373 brain serotonin. J. Pharmacol. Exp. Ther. 154 (3), 499-516.
- 374 21. Kumar, P. and Chaturvedi, C.M. (2008). Correlation of nitric oxide (NO) activity  
375 and gonadal function in Japanese quail, *Coturnix coturnix japonica* following  
376 temporal phase relation of serotonergic and dopaminergic oscillations. Anim.  
377 Reprod. Sci. 106, 48-64.

- 378 22. Le Bras, Y.M. (1984). Circadian variations of catecholamine levels in brain, heart,  
379 and plasma in the eel, *Anguilla Anguilla*, at three different times of year. Gen Comp  
380 Endocrinol. 55(3), 472-479.
- 381 23. Lynch, H.J. (1971). Diurnal oscillations in pineal melatonin content. Life Sci. 10  
382 (14), 791-795.
- 383 24. Manshardt, J. and Wurtman, R.J. (1968). Daily rhythm in the noradrenaline  
384 (norepinephrine) content of rat hypothalamus. Nature. 217 (5128). 574-575.
- 385 25. Owasoya, J.O. and Walker, C.A. (1979). Whitworth UG. Diurnal variation in the  
386 dopamine level of rat brain areas: effect of sodium Phenobarbital. Life Sci. 25 (2),  
387 119-122.
- 388 26. Owasoyo, J.O. and Walker, C.A. (1980). The effect of sodium phenobarbital on the  
389 circadian levels of norepinephrine and serotonin in rat brain areas. Biol Rhy Res. 11  
390 (2), 95-101.
- 391 27. Phillips, D. and Chaturvedi, C.M. (1992b). Photo-sexual responses of young  
392 Japanese quail following circadian administration of neurotransmitters. In: Pati, A.  
393 K. (Ed.), Chronobiology, RSU, Raipur, India, pp. 73-79.
- 394 28. Phillips, D. and Chaturvedi, C.M. (1995). Functional maturation of neuroendocrine  
395 gonadal axis is altered by specific phase relations of circadian neurotransmitter  
396 activity in Japanese quail. Biomedical and Environment Sciences. 8, 367-377.
- 397 29. Philo, R., Rudeen, P.K. and Reiter, R.J. (1977). A comparison of the circadian  
398 rhythms and concentrations of serotonin and norepinephrine in the telencephalon of  
399 four rodent species. Comp Biochem Physiol C. 57 (2), 127-130.
- 400 30. Prasad, S.K. and Chaturvedi, C.M. (1992a). Circadian phase relation of neuro-  
401 transmitter affecting drugs (serotonergic and dopaminergic) alters the gonadal



- 402 activity during quiescent phase of reproductive cycle in Spotted Munia, *Lonchura*  
403 *punctulata*. Int. J. Animal. Sci. 7, 127-129.
- 404 31. Prasad, S.K. and Chaturvedi, C.M. (1992b). Negation of Arrhythmic cyclicity by  
405 circadian phase relation of serotonergic and dopaminergic activity in a subtropical  
406 finch, Spotted Munia. In: Saxena, A.K., Ramamurty, R., Reddy Sreerama, G.,  
407 Saxena, V.L. (Eds.), Recent Advances in Life Sciences, Indian Society of Life  
408 Sciences, Manu Publications, Kanpur, U.P. India, pp 90-99.
- 409 32. Prasad, S.K. and Chaturvedi, C.M. (1992c). Effects of LH and temporal synergism  
410 of neurotransmitter affecting drugs (5-HTP and L-DOPA) on the gonad and body  
411 weight responses of spotted Munia *Lonchura punctulata*. J. Rep. Biol. Comp.  
412 Endocrinol. 4 (1), 1-8.
- 413 33. Prasad, S.K. and Chaturvedi, C.M. (2003). Regulation of seasonal reproduction by  
414 neurotransmitter affecting drugs in spotted munia, *Lonchura punctulata*. Pakistan J.  
415 Zool. 35 (3), 181-189.
- 416 34. Quay, W.B. (1968). Differences in circadian rhythms in 5-hydroxytryptamine  
417 according to brain region. Am J Physiol. 215(6), 1444-1453.
- 418 35. Reis, D.J. and Wurtman, R.J. (1968). Diurnal changes in brain noradrenalin. Life  
419 Sci. 7 (1), 91-98.
- 420 36. Reis, D.J., Weinbren, M. and Corvelli, A. (1969). A circadian rhythm of  
421 norepinephrine regionally in cat brain: its relationship to environmental lighting and  
422 to regional diurnal variations in brain serotonin. J Pharmacol Exp Ther. 164 (1),  
423 135-145.
- 424 37. Saito, Y. (1971). The circadian rhythm of brain acetylcholine levels and motor  
425 activity in the rat. Life Sci. 10 (13), 735-744,

- 426 38. Sethi, S. and Chaturvedi, C.M. (2009). Temporal synergism of neurotransmitters  
427 (Serotonin and Dopamine) affects testicular development in mice (*Mus musculus*).  
428 Zoology. 112 (6), 461-470.
- 429 39. Sethi, S., Tsutsui, K. and Chaturvedi, C.M. (2010). Temporal phase relation of  
430 circadian neural oscillations alters RFamide-related peptide -3 and testicular  
431 function in the mouse. Neuroendocrinol. 91, 189-199.
- 432 40. Tiwari, A.C. and Chaturvedi, C.M. (2003). Effect of temporal synergism of neural  
433 oscillators on gonadal development, egg production and hatchability of Japanese  
434 quail (*Coturnix coturnix*). Indian J. Poul. Sci. 38 (2), 83-88.
- 435 41. Tiwari, A.C., Kumar, P., Singh, S., Sharma, D. and Chaturvedi, C.M. (2006).  
436 Reproductive phase dependent circadian variation in hypothalamic concentration of  
437 serotonin, dopamine and peripheral thyroxine levels in Japanese quail following 5-  
438 HTP and L- DOPA administration at specific time intervals. Biol. Rhythm Res. 37  
439 (1), 73-86.
- 440 42. Wilson, J.M. and Meier, A.H. (1987). Seasonal changes in the circadian rhythms of  
441 serotonin and dopamine concentration in right and left supra chiasmatic nuclei  
442 (SCN) of Syrian hamster. Chronobiol. 14, 255.
- 443 43. Wilson, J.M. and Meier, A.H. (1988). Seasonal changes in the phase relations of  
444 circadian neurotransmitter rhythms in the anterior hypothalamus (Abstract). IEEE  
445 Transaction. 4, 1820-1821.
- 446 44. Wilson, J.M. and Meier, A.H. (1989). Resetting the annual cycle with timed daily  
447 injections of 5-hydroxytryptophan and L- dihydroxyphenylalanine in Syrian  
448 hamsters. Chronobiology International. 6, 113-132.

- 449 45. Yadav, S. and Chaturvedi, C.M. (2014). Internal coincidence of serotonergic and  
450 dopaminergic oscillations modulates photo-sexual responses of Japanese quail,  
451 *Coturnix coturnix japonica*. Ind J Exp Biol. 52 (5), 489-495
- 452 46. Yadav, S. and Chaturvedi, C.M. (2015). Interaction of specific temporal phase  
453 relations of circadian neural oscillations and long term photoperiodic responses in  
454 Japanese quail, *Coturnix coturnix japonica*. Gen Com Endocrinol. 54-6, 217-218.
- 455
- 456
- 457

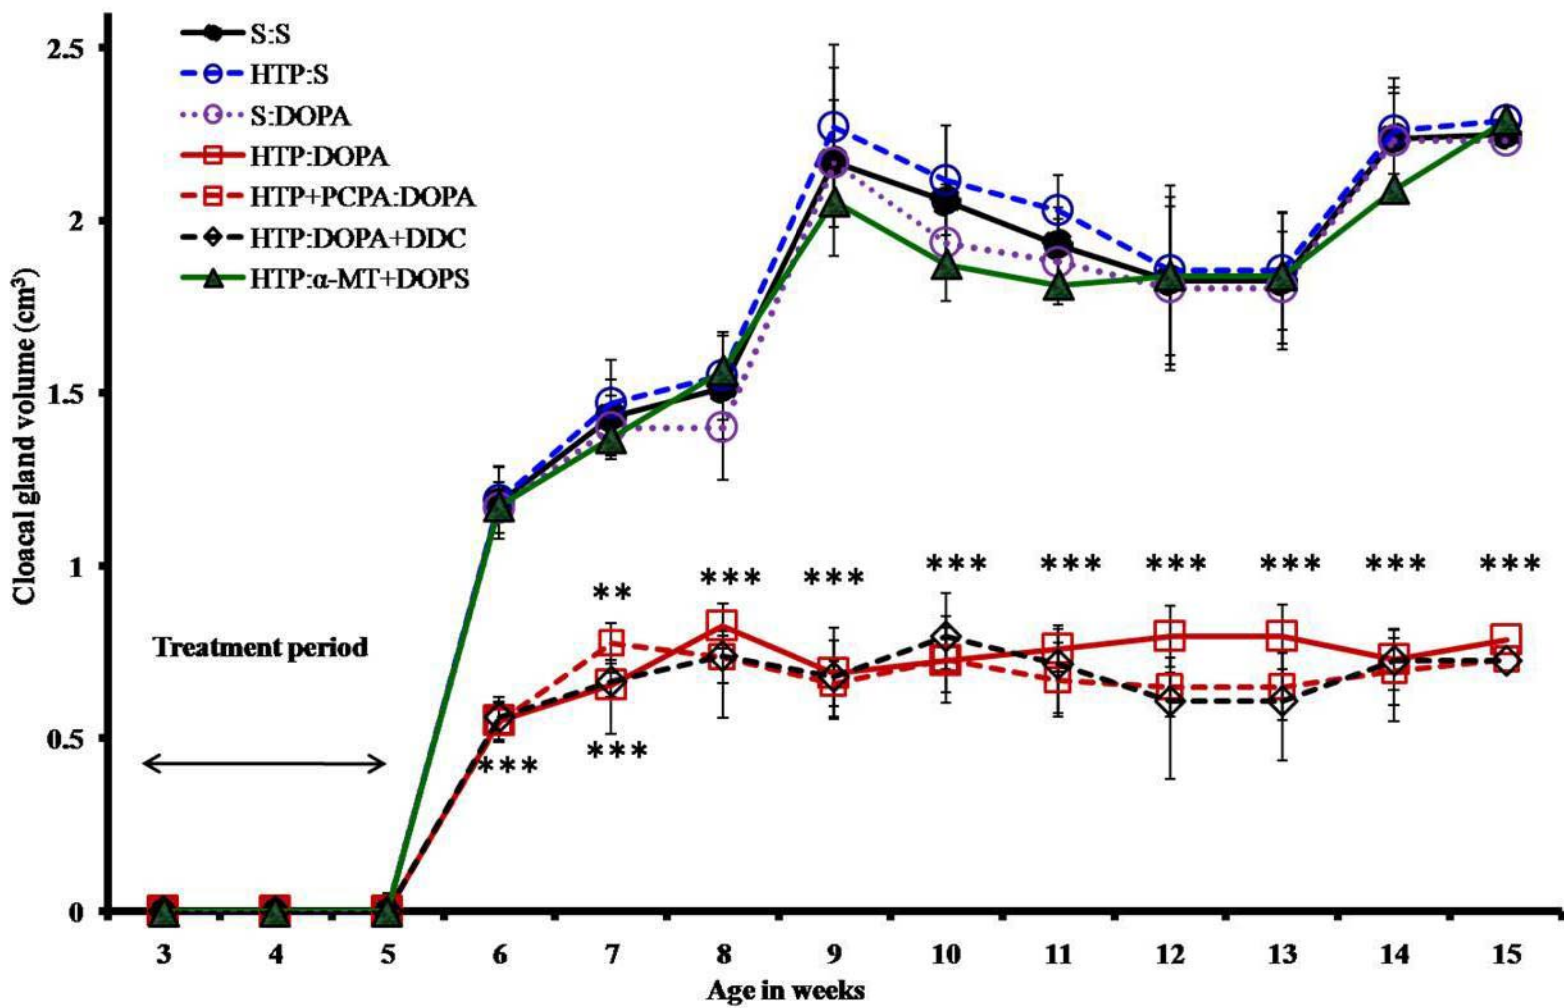

**Fig. 1. Cloacal gland responses of Japanese quail receiving 5-HTP and L-DOPA in combination with saline and agonist and/or antagonist of serotonin and catecholamines 8 hrs apart.**

Data is presented as means  $\pm$  SEM. \*\*p<0.01, \*\*\*p<0.001, Significance of difference from the control group.

Group details:

|                        |                                                                                                          |
|------------------------|----------------------------------------------------------------------------------------------------------|
| Saline control/S:S     | - Received normal saline (0.9%) twice a day at 8am and 4pm i.e. at the interval of 8 hrs.                |
| HTP control/HTP:S      | - 5-HTP was administered at 8 am and saline at 4 pm i.e. at the interval of 8 hrs.                       |
| DOPA control/S:DOPA    | - Saline was injected at 8 am and L-DOPA at 4 pm i.e. at the interval of 8 hrs.                          |
| HTP:DOPA               | -5-HTP and L-DOPA injections were given 8 hr apart.                                                      |
| HTP+PCPA:DOPA          | -received 5- HTP and PCPA simultaneously at 8 am, and L-DOPA was injected after 8 hrs.                   |
| HTP:DOPA+DDC           | -5-HTP was injected at 8 am and 8 hrs later, L-DOPA and DDC were injected simultaneously.                |
| HTP: $\alpha$ -MT+DOPS | -5-HTP was injected at 8 am and 8 hrs later, $\alpha$ -MT and DOPS were injected simultaneously at 4 pm. |

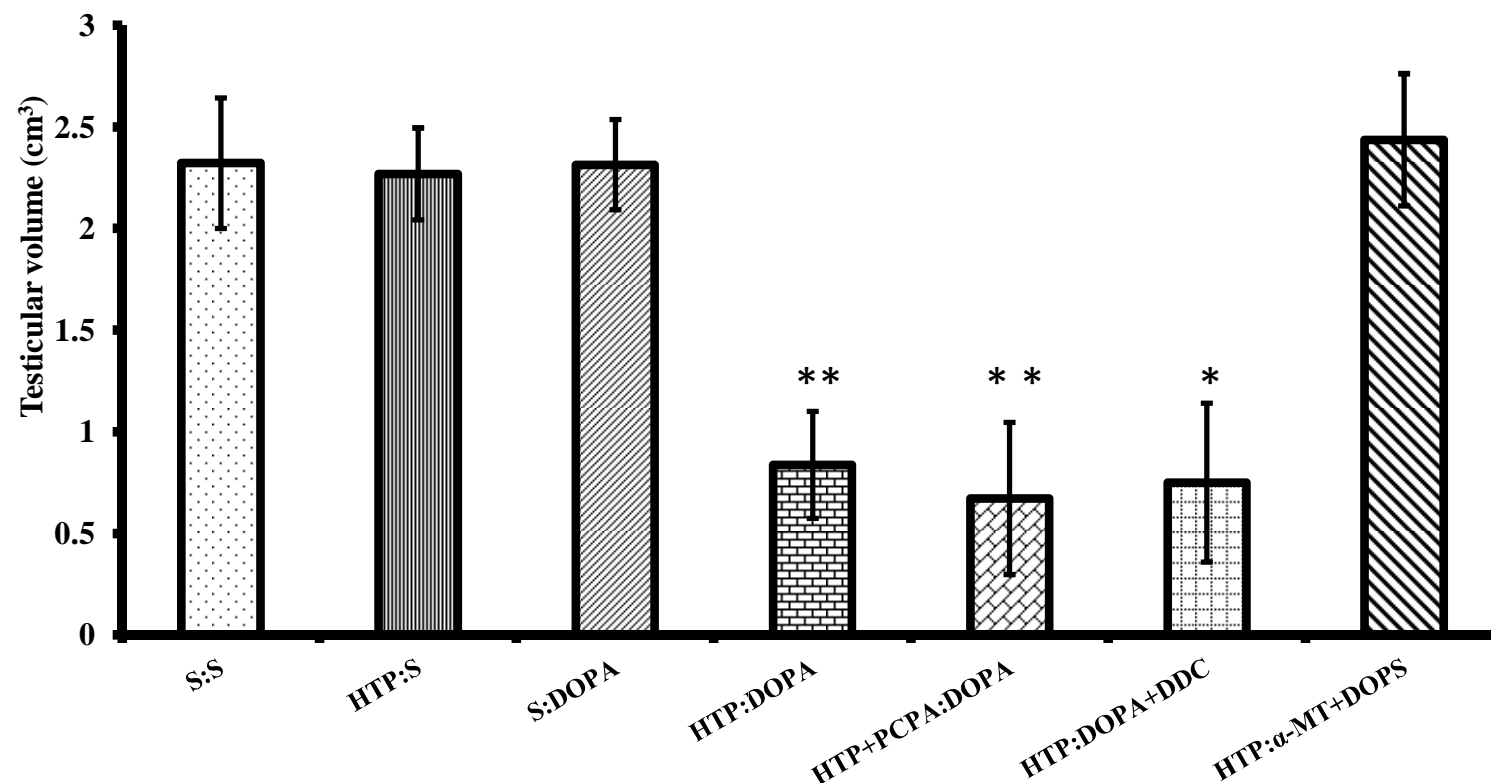

**Fig. 2. Testicular volume of Japanese quail receiving 5-HTP and L-DOPA in combination with saline and agonist and/or antagonist of serotonin and catecholamine 8 hrs apart.** For group details, see Fig. 1. Data is presented as mean ± SEM. \* $p < 0.05$ , \*\* $p < 0.01$ ; Significance of difference from the control (S:S) group.

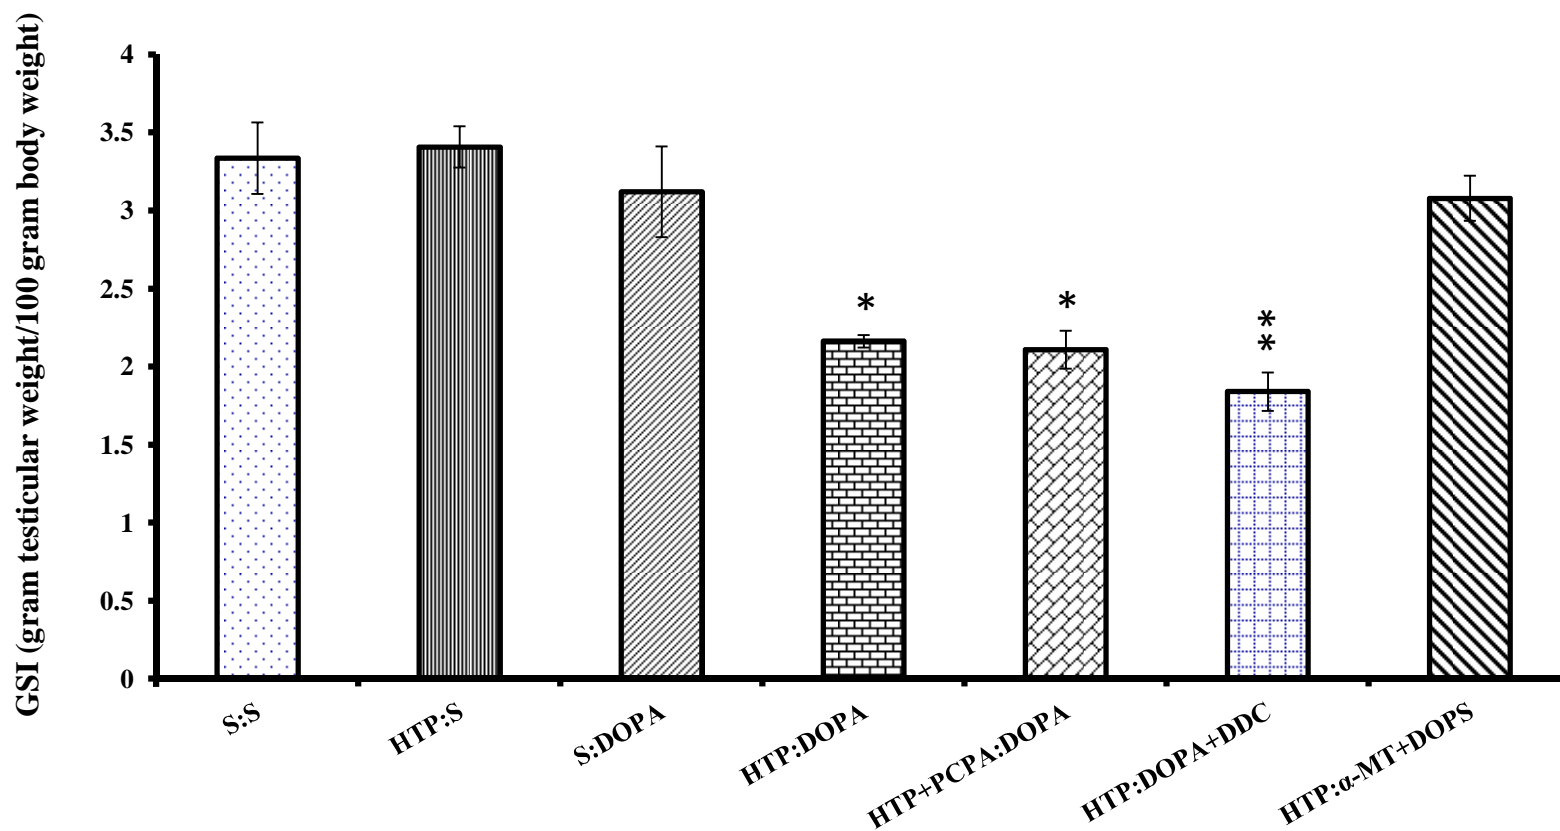

**Fig. 3. GSI (Gonadosomatic index) of Japanese quail receiving 5-HTP and L-DOPA in combination with saline and agonist and/or antagonist of serotonin and catecholamine 8 hrs apart. For group details, see Fig. 1.**

Data is presented as mean ± SEM. \* $p < 0.05$ , \*\* $p < 0.01$ ; significance of difference from the control group

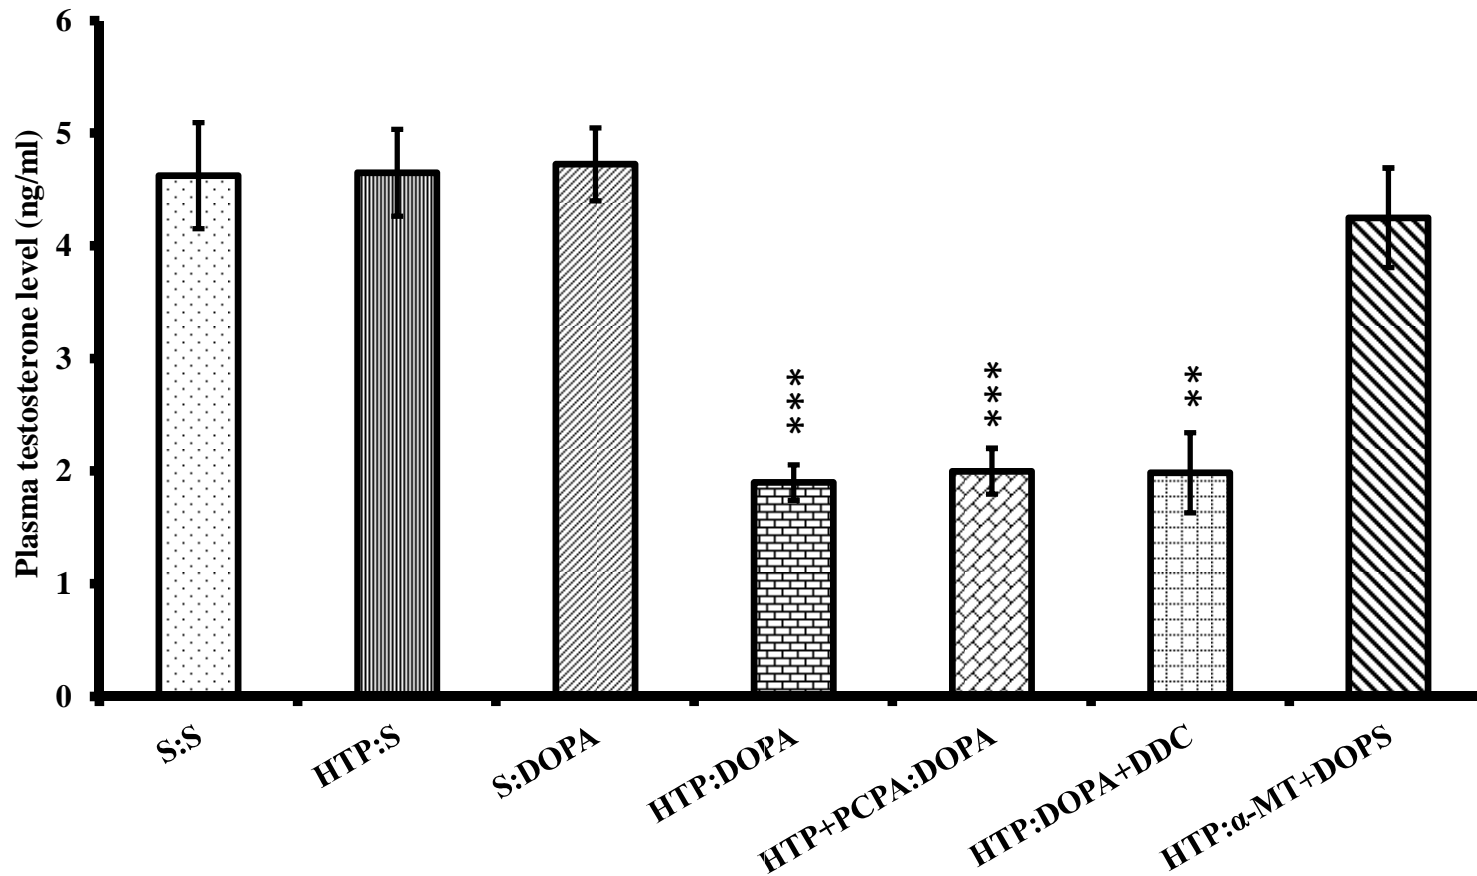

**Fig. 4.** Plasma testosterone level of Japanese quail receiving 5-HTP and L-DOPA in combination with saline and agonist and/or antagonist of serotonin and catecholamine 8 hrs apart. \*\*p<0.01, \*\*\*p<0.001; Significance of difference from the control group.



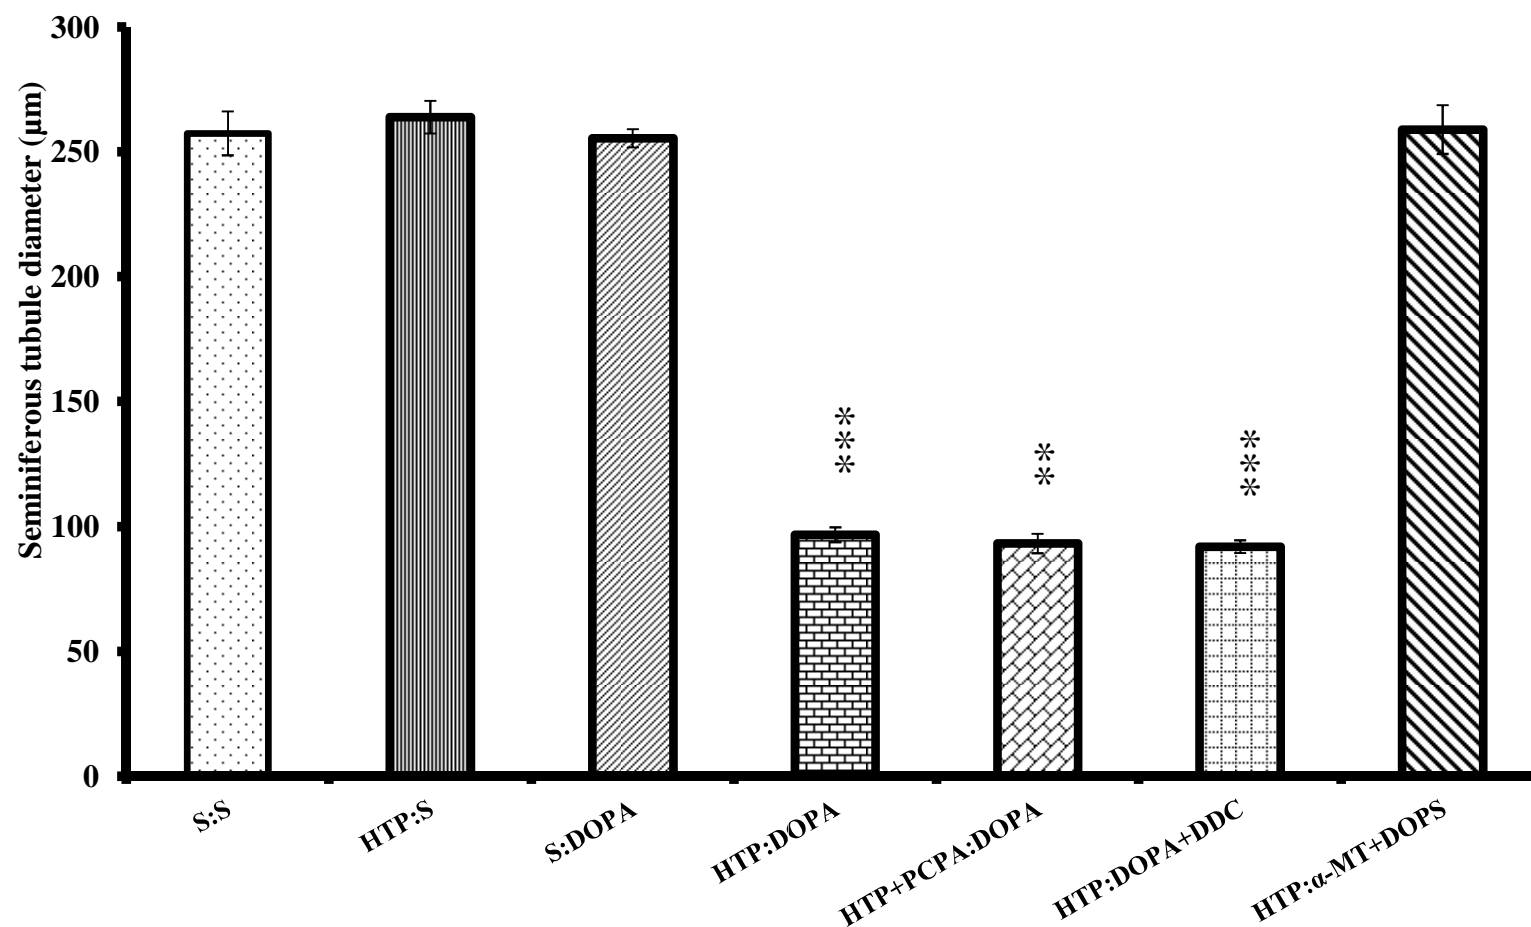

**Fig. 5.** Seminiferous tubule diameter of Japanese quail receiving 5-HTP and L-DOPA in combination with saline and agonist and/or antagonist of serotonin and catecholamine 8 hrs apart. \*\* $p < 0.01$ , \*\*\* $p < 0.001$ ; Significance of difference from the control group.

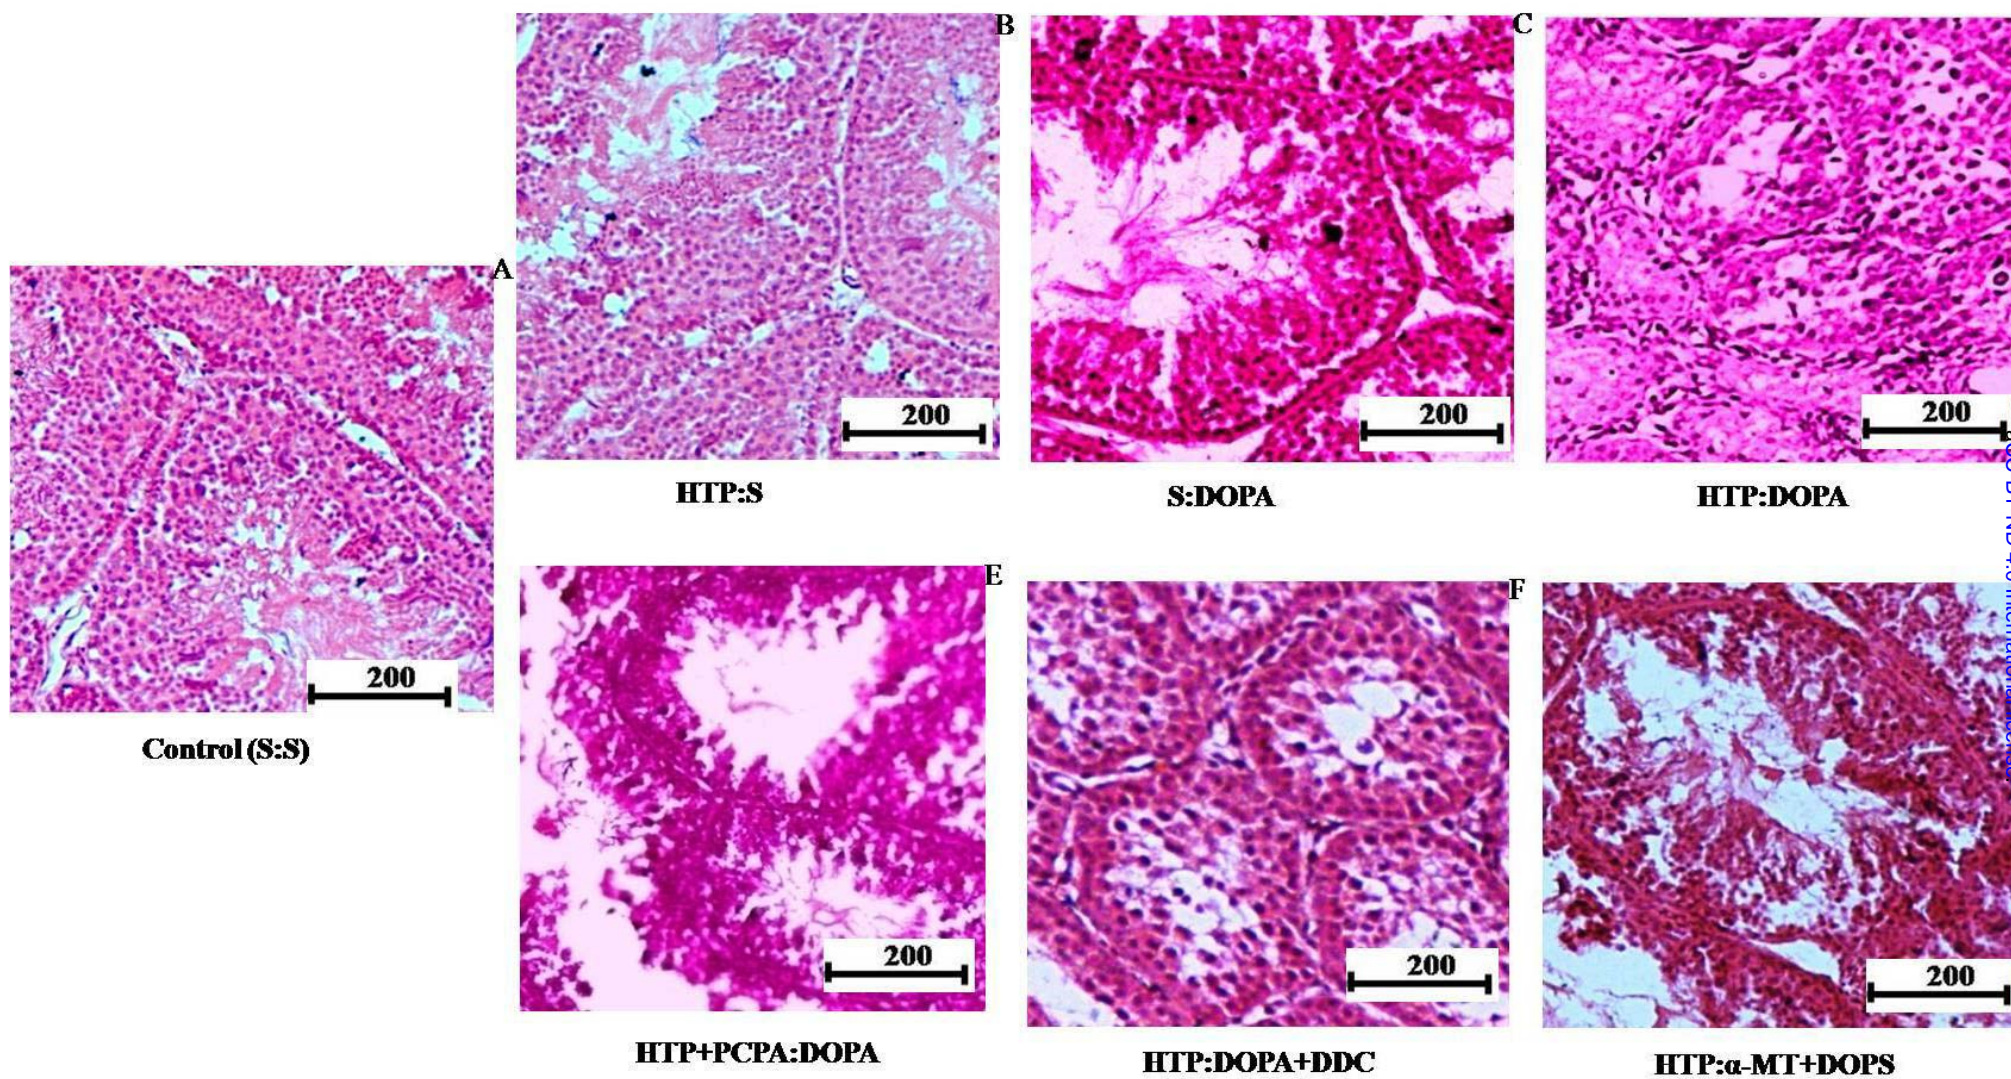

**Fig. 6. T.S. of testis of Japanese quail receiving 5-HTP and L-DOPA in combination with saline and agonist and/or antagonist of serotonin and catecholamines 8 hrs apart.**

- A. Control (S:S)- Note full breeding condition of testis having enlarged seminiferous tubules with all the stages of spermatogenesis and spermatozoa in the lumen.
- B. HTP control (HTP:S)- showing full breeding condition as in S:S quail testis.
- C. DOPA control (S:DOPA)- showing full breeding condition as in S:S quail testis.
- D. HTP:DOPA- Note non breeding condition with smaller seminiferous tubules containing only inactive spermatogonial cells and some vacuolation and debris in the lumen of few tubules
- E. HTP+PCPA:DOPA- Note smaller seminiferous tubules with suppression of stages of spermatogenic activity and empty lumen or some debris in lumen .
- F. HTP:DOPA+DDC- Note non-breeding and spermatogenetically inactive condition having smaller seminiferous tubules containing inactive spermatogonial cells and vacuolation.
- G. HTP:  $\alpha$ -MT+DOPS group receiving 5-HTP and  $\alpha$ -MT +DOPS at the interval of 8 hr. This section shows normal breeding condition like control.
